# Supplementary material for: Neuroblastoma plasticity during metastatic progression stems from the dynamics of an early sympathetic transcriptomic trajectory
Source: PubMed Central journal article supplement — Nat Commun. 2024 Nov 6;15:9570. doi: 10.1038/s41467-024-53776-3 (PMC11538482; doi:10.1038/s41467-024-53776-3), 2024-11-06
Supplement: 41467_2024_53776_MOESM4_ESM.pdf [file 41467_2024_53776_MOESM4_ESM.pdf]

## **Description of Additional supplementary files**

**Supplementary movie 1** | 3D lightsheet video of an E5 avian embryo grafted with IGR-N91::GFP cells at E2 and labeled with a-NF160 (grey) and a-GFP (green, IGR-N91::GFP cells)

**Supplementary movie 2** | 3D lightsheet video of kidneys and adrenal glands dissected from an E14 avian embryo grafted with IGR-N91::GFP cells at E2 and labeled with a-NF160 (grey) and a-GFP (green, IGR-N91::GFP cells)

**Supplementary movie 3** | 3D lightsheet video of kidneys and adrenal glands dissected from an E14 avian embryo grafted with IGR-N91::GFP cells at E2 and labeled with a-SMA (red) and a-GFP (green, IGR-N91::GFP cells)

**Supplementary movie 4** | 3D lightsheet video of an adrenal tumor dissected from an E14 avian embryo grafted with IGR-N91::GFP cells at E2 and labeled with a-SMA (red) and a-GFP (green, IGR-N91::GFP cells)

**Supplementary movie 5** | 3D lightsheet video of the thorax and abdomen dissected from an E14 avian embryo grafted with IGR-N91::GFP cells at E2 and labeled with a-NF160 (grey) and a-GFP (green, IGR-N91::GFP cells)

**Supplementary movie 6** | 3D lightsheet video of a sympathetic tumor dissected from an E14 avian embryo grafted with IGR-N91::GFP cells at E2 and labeled with a-NF160 (grey) and a-GFP (green, IGR-N91::GFP cells). Supp. movie 6 is a zoom from Supp. Movie 5

**Supplementary movie 7** | 3D lightsheet video of a dorsal aorta dissected from an E14 avian embryo grafted with IGR-N91::GFP cells at E2 and labeled with a-SMA (red) and a-GFP (green, IGR-N91::GFP cells)

**Supplementary movie 8** | 3D lightsheet video of peripheral nerve tracts dissected from an E14 avian embryo grafted with IGR-N91::GFP cells at E2 and labeled with a-NF160 (grey) and a-GFP (green, IGR-N91::GFP cells)

**Supplementary movie 9** | 3D lightsheet video a peripheral nerve dissected from an E14 avian embryo grafted with IGR-N91::GFP cells at E2 and labeled with a-NF160 (grey) and a-GFP (green, IGR-N91::GFP cells)

**Supplementary movie 10** | 3D lightsheet video of iliac and femoral bones dissected from an E14 avian embryo grafted with IGR-N91::GFP cells at E2 and labeled with a-NF160 (grey) and a-GFP (green, IGR-N91::GFP cells)

**Supplementary movie 11** | 3D lightsheet video of a femur dissected from an E14 avian embryo grafted with IGR-N91::GFP cells at E2 and labeled with a-SMA (red) and a-GFP (green, IGR-N91::GFP cells)

**Supplementary movie 12** | 3D lightsheet video of marrow blood vessels into a femur dissected from an E14 avian embryo grafted with IGR-N91::GFP cells at E2 and labeled with a-SMA (red) and a-GFP (green, IGR-N91::GFP cells). Supp. movie 12 is a zoom from Supp. Movie 11
